# Supplementary material for: Normal reference intervals for cardiac dimensions and function for use in echocardiographic practice: a guideline from the British Society of Echocardiography
Source: PubMed Central journal article supplement — Echo Res Pract. 2020 Jan 28;7(1):G1–G18. doi: 10.1530/ERP-19-0050 (PMC7040881; doi:10.1530/erp-19-0050), 2020-01-28
Supplement: supplementary_table_1.pdf [file supplementary_table_1.pdf]

**Supplementary Table 1**

| Echo parameter                                       | Males       | Females     |
|------------------------------------------------------|-------------|-------------|
| <b>LV Linear dimensions</b>                          |             |             |
| LVIDd (mm)                                           | 37 – 56     | 35 – 51     |
| LVIDs (mm)                                           | 22 – 41     | 20 – 37     |
| IVSd (mm)                                            | 6 – 12      | 5 – 11      |
| LVPWd (mm)                                           | 6 – 12      | 6 – 12      |
| <b>LV mass</b>                                       |             |             |
| Indexed LV mass (g/m <sup>2</sup> )                  | 40 – 110    | 33 – 99     |
| <b>LV volumes</b>                                    |             |             |
| Indexed LV end-diastolic volume (ml/m <sup>2</sup> ) | 30 – 79     | 29 – 70     |
| Indexed LV end-systolic volume (ml/m <sup>2</sup> )  | 9 – 31      | 8 – 27      |
| <b>Average mitral annular s' (cm/s)</b>              |             |             |
| 20-40 years                                          |             | ≥6.4        |
| 40-60 years                                          |             | ≥5.7        |
| >60 years                                            |             | ≥4.9        |
| <b>Right heart size and function</b>                 |             |             |
| Indexed RVED area (cm <sup>2</sup> /m <sup>2</sup> ) | ≤13.6       | ≤12.6       |
| Indexed RA area (cm <sup>2</sup> /m <sup>2</sup> )   | ≤11         | ≤11         |
| RVD1 (mm)                                            | 26 – 47     | 22 – 43     |
| RVD2 (mm)                                            | 19 – 42     | 17 – 35     |
| RVD3 (mm)                                            | 55 – 87     | 51 – 80     |
| RVOT proximal (mm)                                   | 24 – 44     | 20 – 42     |
| Fractional area change (%)                           | ≥30         | ≥35         |
| RV s' (cm/s)                                         |             | ≥9          |
| <b>Aortic dimensions (IE-IE)</b>                     |             |             |
| Sinus of Valsalva (mm/m)                             | 13.8 – 21.8 | 13.1 – 20.7 |
| Sino-tubular junction (mm/m)                         | 11.4 – 18.6 | 11.0 – 17.8 |
| Proximal ascending aorta (mm/m)                      | 11.5 – 19.9 | 11.4 – 19.8 |

|                                      | Severely<br>impaired LVEF | Impaired LVEF     | Borderline low<br>LVEF | Normal LVEF |
|--------------------------------------|---------------------------|-------------------|------------------------|-------------|
| LVEF (%)                             | ≤35%                      | 36–49%            | 50–54%                 | ≥55%        |
|                                      | <b>Normal</b>             | <b>Borderline</b> | <b>Dilated</b>         |             |
| LA Volume index (ml/m <sup>2</sup> ) | <34                       | 34–38             | >38                    |             |
